# Supplementary material
Source: PubMed Central journal article supplement (PMC5952261)
Supplement: id7b00238_si_001.pdf [file id7b00238_si_001.pdf]

## Supplementary Information

**Sputum active polymyxin lipopeptides: Activity against Cystic Fibrosis *Pseudomonas aeruginosa* isolates and their interactions with sputum biomolecules**

Elena K. Schneider-Futschik<sup>1,2</sup>, Olivia K.A. Paulin<sup>1</sup>, Daniel Hoyer<sup>2,4,7</sup>, Kade D. Roberts<sup>3</sup>,  
James Ziogas<sup>2</sup>, Mark A. Baker<sup>5</sup>, John Karas<sup>2</sup>, Jian Li<sup>6†</sup>, Tony Velkov<sup>1,2†\*</sup>

**Number of pages: 6**  
**Number of figures: 5**  
**Number of tables: 0**

**Figure S1**

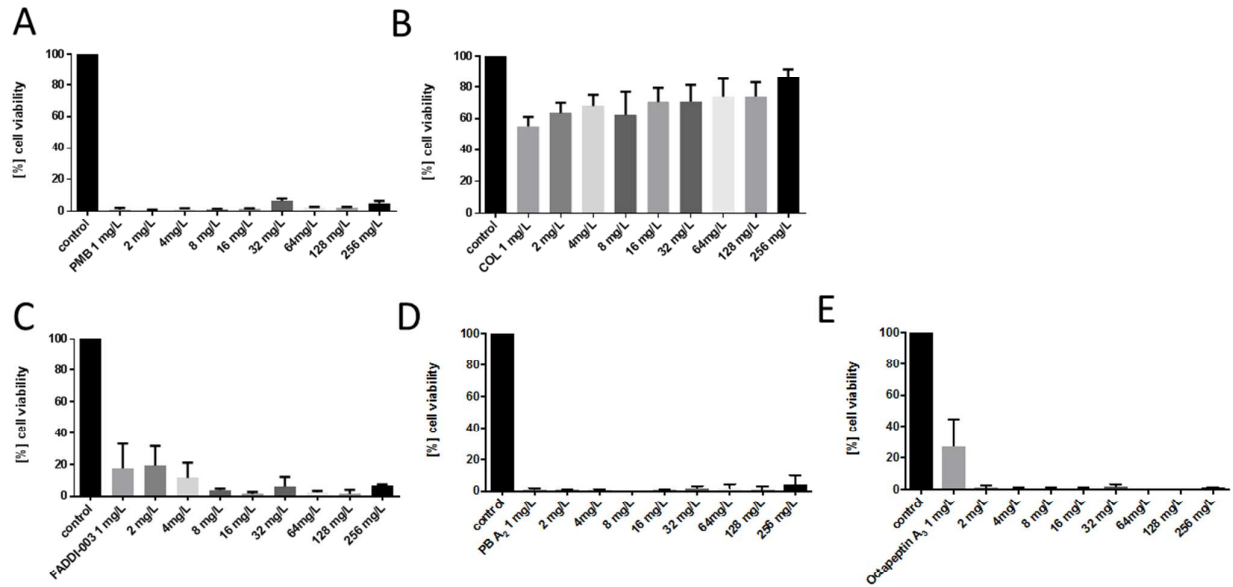

**Figure S1.** Activity of (A) polymyxin B; (B) colistin; (C) FADDI-003; (D) polymyxin A<sub>2</sub> and (E) octapeptin A<sub>3</sub> against the *P. aeruginosa* reference strain FADDI-PA021 grown under planktonic conditions in artificial sputum media. Data are presented as the mean  $\pm$ SD (n=3).

**Figure S2**

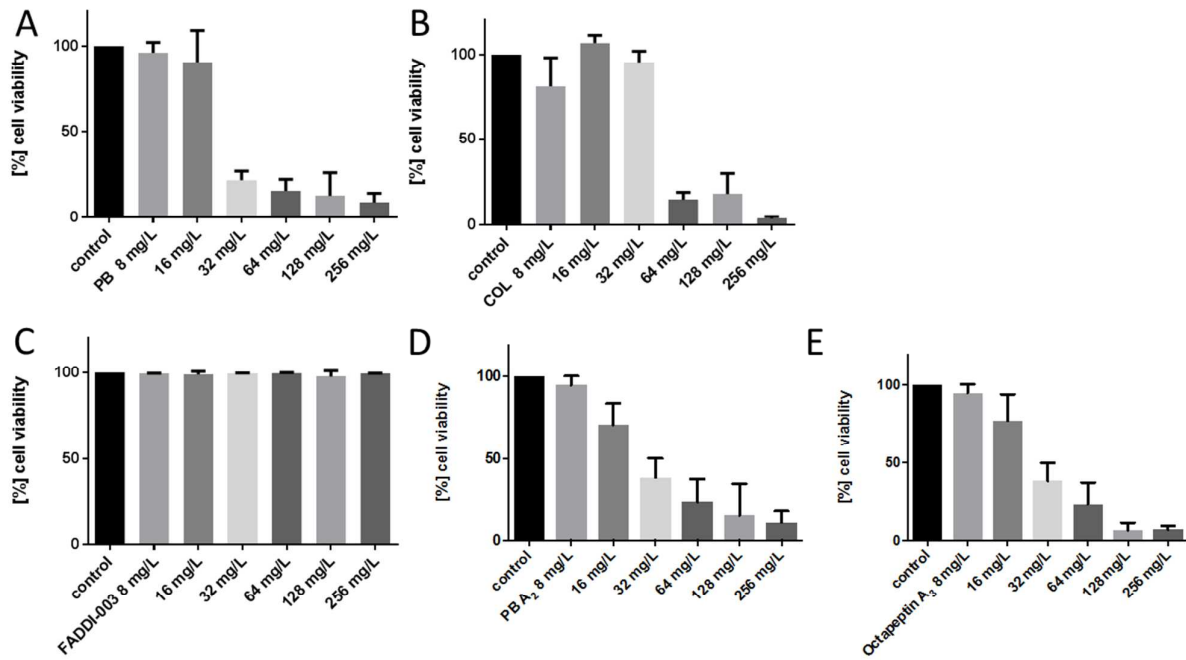

**Figure S2.** Activity of (A) polymyxin B; (B) colistin; (C) FADDI-003; (D) polymyxin A<sub>2</sub> and (E) octapeptin A<sub>3</sub> against the *P. aeruginosa* reference strain FADDI-PA021 grown under biofilm conditions in artificial sputum media. Data are presented as the mean  $\pm$ SD (n=3).

**Figure S3**

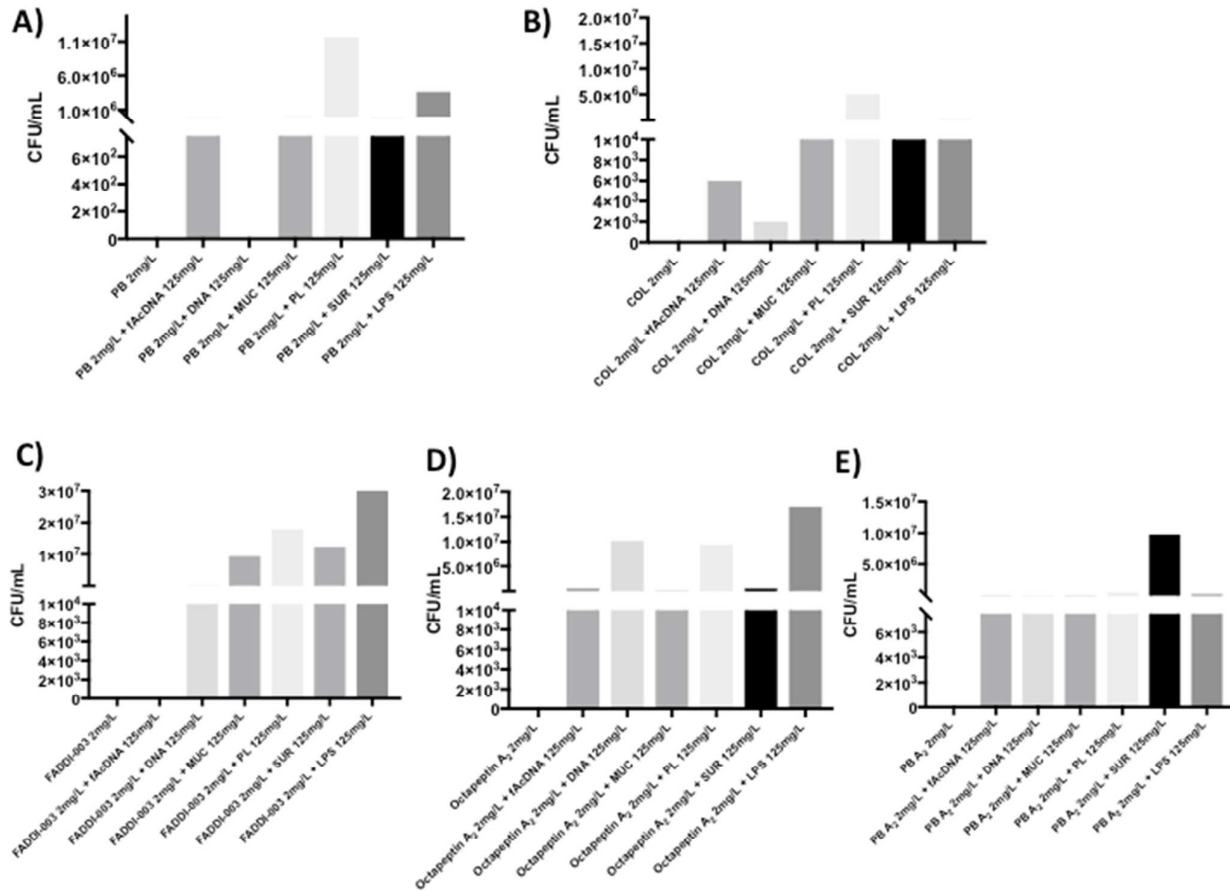

**Figure S3.** Influence of sputum biomolecules at 125 mg/L on the activity of (A) polymyxin B; (B) colistin; (C) FADDI-003; (D) octapeptin A<sub>3</sub> and (E) polymyxin A<sub>2</sub> against the *P. aeruginosa* reference strain FADDI-PA021. Data are presented as the mean ±SD (n=3).

fAcDNA – f-Actin and DNA

MUC – mucin

PL – phospholipids

SUR – surfactant

LPS – lipopolysaccharide

**Figure S4**

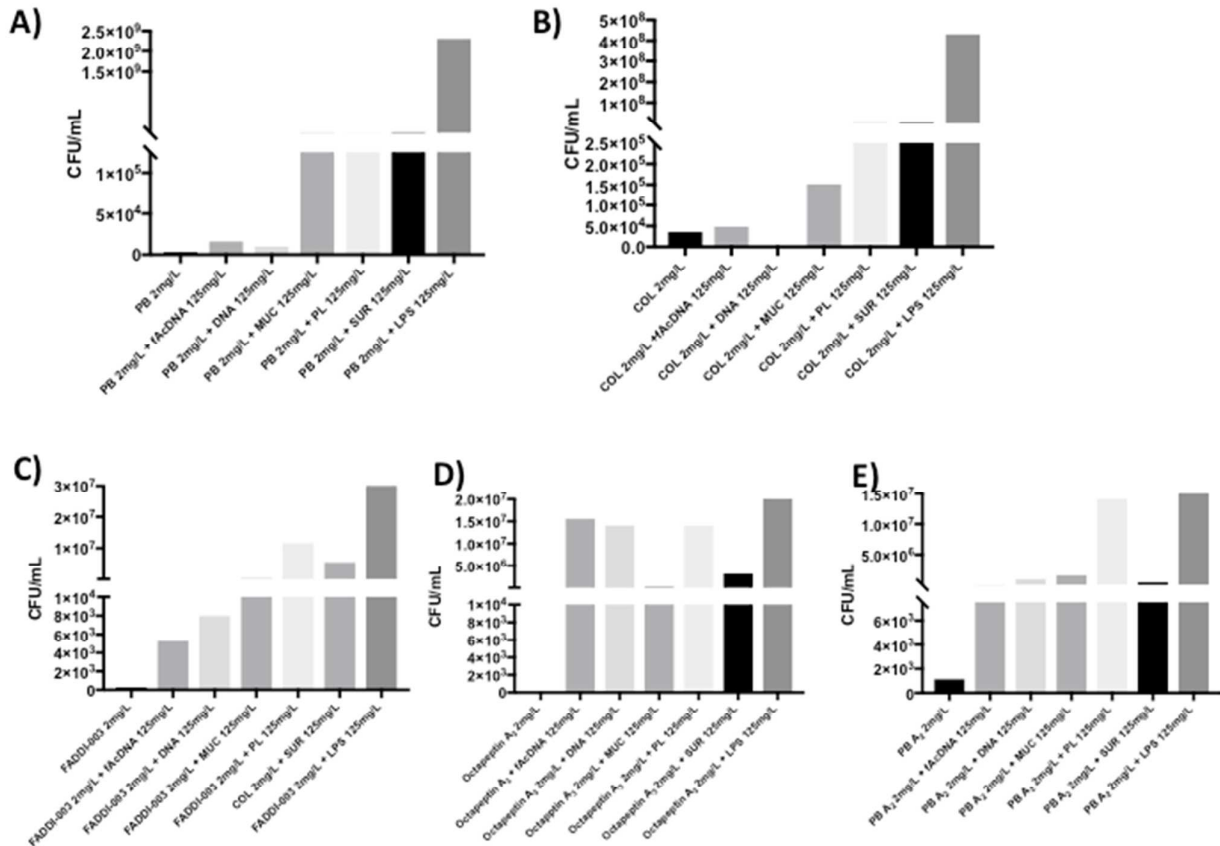

**Figure S4.** Influence of sputum biomolecules at 125 mg/L on the activity of (A) polymyxin B; (B) colistin; (C) FADDI-003; (D) octapeptin A<sub>3</sub> and (E) polymyxin A<sub>2</sub> against *P. aeruginosa* FADDI-PA020. Data are presented as the mean ±SD (n=3).

fAcDNA – *f*-Actin and DNA

MUC – mucin

PL – phospholipids

SUR – surfactant

LPS – lipopolysaccharide

**Figure S5**

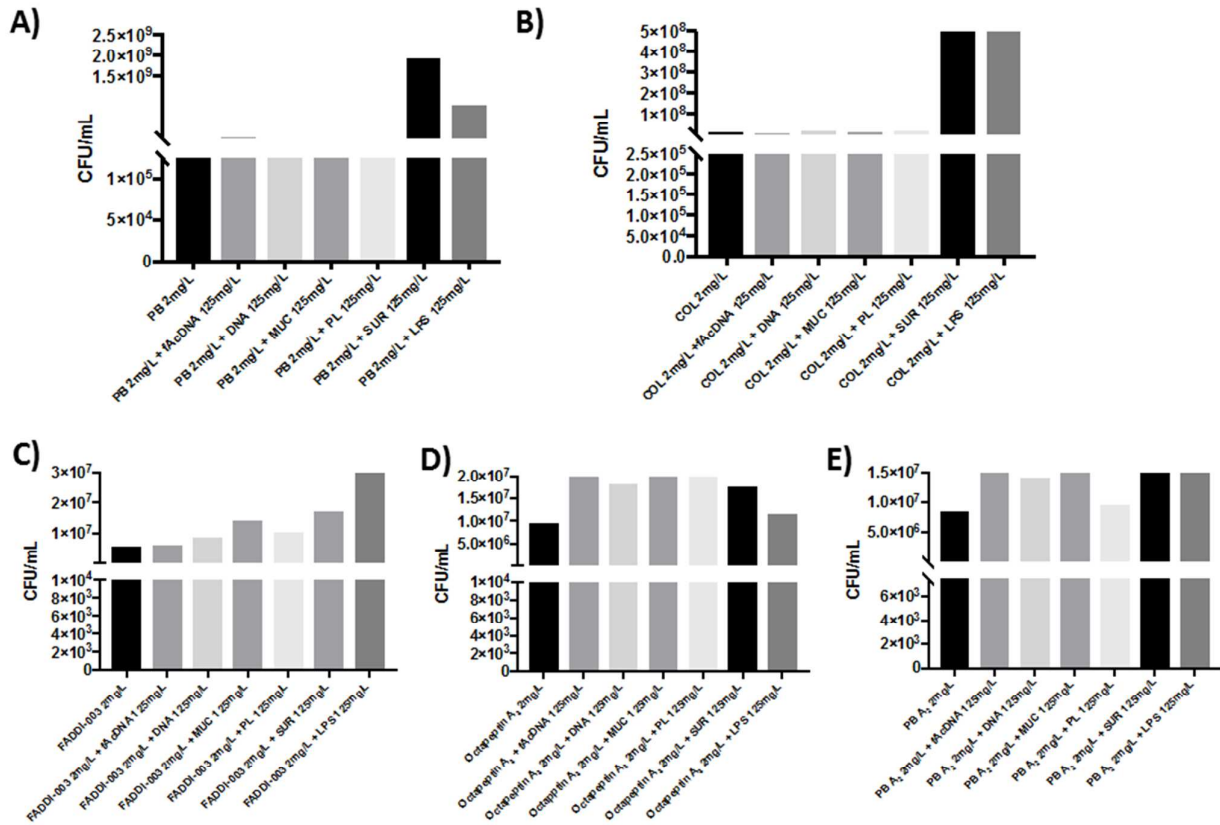

**Figure S5.** Influence of sputum biomolecules at 125 mg/L on the activity of (A) polymyxin B; (B) colistin; (C) FADDI-003; (D) octapeptin A<sub>3</sub> and (E) polymyxin A<sub>2</sub> against *P. aeruginosa* FADDI-PA066. Data are presented as the mean ±SD (n=3).

fAcDNA – *f*-Actin and DNA

MUC – mucin

PL – phospholipids

SUR – surfactant

LPS – lipopolysaccharide
